# Supplementary material for: Malignant Evaluation and Clinical Prognostic Values of M6A RNA Methylation Regulators in Prostate Cancer
Source: PubMed Central journal article supplement (PMC8120168; doi:10.7150/jca.55140), 2021-04-24
Supplement: jcav12p3575s1.pdf [file jcav12p3575s1.pdf]

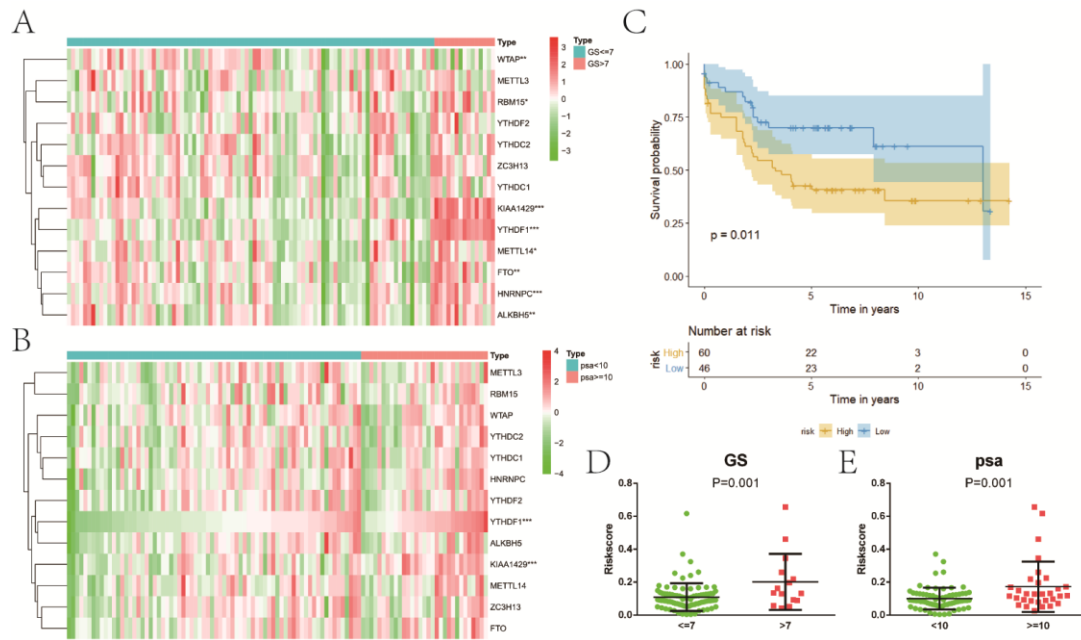

**FigureS1.** External validation results in GSE54460 dataset. **A-B**, differences in expression of m6A RNA methylation regulators regarding GS (A) and psa (B); **C**, KM curve of RFS between high-risk and low-risk group; **D-E**, distribution of risk scores in patients stratified by GS (D) and psa (E). GS, Gleason score; psa, prostate specific antigen; KM, Kaplan-Meier; RFS, recurrence-free survival.
